# Supplementary material for: Needle-like CoO nanowires grown on carbon cloth for enhanced electrochemical properties in supercapacitors
Source: Royal Society of Chemistry journal article supplement (doi:10.1039/c5ra01364j), 2015-01-01
Supplement: c5ra01364j1.pdf [file c5ra01364j1.pdf]

## *Supporting Information*

### **Needle-like CoO Nanowires Grown on Carbon Cloth for Enhanced Electrochemical Properties in Supercapacitors**

D. L. Ji,<sup>a,b,d</sup> J. H. Li,<sup>c\*</sup> L. M. Chen,<sup>a\*</sup> D. Zhang,<sup>a</sup> T. Liu,<sup>a</sup> N. Zhang,<sup>b</sup> R. Z. Ma,<sup>b</sup> G. Z. Qiu<sup>a</sup> and X. H. Liu<sup>a,b,d\*</sup>

<sup>a</sup> Department of Inorganic Materials, Central South University, Changsha, Hunan 410083, P. R. China.

E-mail: [liuxh@csu.edu.cn](mailto:liuxh@csu.edu.cn); [chenlimiao@csu.edu.cn](mailto:chenlimiao@csu.edu.cn)

<sup>b</sup> School of Materials Science and Engineering, Central South University, Changsha, Hunan 410083, P. R. China.

<sup>c</sup> State Key Laboratory of High Performance Complex Manufacturing, School of Mechanical and Electrical Engineering, Central South University, Changsha, Hunan 410083, P. R. China.

E-mail: [lijunhui@csu.edu.cn](mailto:lijunhui@csu.edu.cn)

<sup>d</sup> Institute for Materials Microstructure, Central South University, Changsha, Hunan 410083, P. R. China.

#### **Experimental Section**

All the chemicals were of analytical grade and were used without further purification. Before using, commercially available Carbon Cloth (CC, ca. 1 cm × 10 cm) was cut into the appropriate size, cleaned by ultrasonication with ethanol and distilled water several times, and then dried in an oven at 60 °C for 2 h.

*Materials Synthesis.* In a typical process, 2 mmol of Co(NO<sub>3</sub>)<sub>2</sub>·6H<sub>2</sub>O, 4 mmol of NH<sub>4</sub>F, 10 mmol of urea were dissolved in 35 mL deionized water under magnetically stirring for 30 min. The solution was transferred into a 40 mL

Teflon-lined stainless steel autoclave. Then, a piece of the pre-treated CC was vertically immersed in above solution. Hydrothermal synthesis was carried out at 100 °C for 12 h. After cooling to room temperature naturally, the precursor was ultrasonically cleaned for several times with deionized water and ethanol, dried at 60 °C for 2 h. Finally, the precursor could be completely converted into needle-like CoO or Co<sub>3</sub>O<sub>4</sub> nanowires supported on the CC by heat treatment at 450 °C in high-purity Ar gas ambient or at 350 °C in air for 2 h, respectively. The mass loading of the CoO and Co<sub>3</sub>O<sub>4</sub> nanowires on CC was around 1.9 and 2 mg cm<sup>-2</sup>, respectively. Lamellar precursor could be prepared with the absence of NH<sub>4</sub>F during the hydrothermal process, which could be more readily calcined into rectangular CoO nanosheets supported on the CC at 450 °C for 2 h under argon flow. The mass loading of the CoO nanosheets on CC was around 1.2 mg cm<sup>-2</sup>. Furthermore, CoO microspheres could be obtained without use of carbon cloth during the synthetic process.

*Materials Characterization.* The crystal structure of as-synthesized products were determined by X-ray diffraction (XRD) using a D/max2550 VB + X-ray diffractometer with Cu K $\alpha$  radiation ( $\lambda = 1.5418 \text{ \AA}$ ). The morphology and microstructures were characterized using field-emission scanning electron microscopy (FESEM; JEOL JSM-6700F, 5 kV), and transmission electron microscopy (TEM; JEOL, JEM-2010 HT).

*Electrochemical measurements.* The needle-like CoO nanowires/CC, Co<sub>3</sub>O<sub>4</sub> nanowires/CC and CoO nanosheets/CC hybrid structures (~1 cm<sup>2</sup> in area) were directly acted as the working electrode without any ancillary materials. For electrochemical measurements of nanowire-assembled CoO microspheres, the working electrode is consisted of active material, carbon black, and polymer binder (polyvinylidene fluoride; PVDF) in a weight ratio of 80:10:10. The slurry was pasted to Ni foam and then dried at 120 °C overnight under vacuum. Electrodes were tested on interface 1000 Electrochemical Workstation in a three-electrode electrochemical cell using a 2 M KOH aqueous solution as electrolyte at room temperature. Ag/AgCl electrode and Pt wire were used as

reference and counter electrode, respectively. The specific capacitance is calculated according to the following equations:  $C = I\Delta t/m\Delta V$ , where  $I$  is charge-discharge current,  $\Delta t$  is the time for a full discharge,  $m$  indicates the mass of the active material, and  $\Delta V$  represents the voltage change after a full discharge.

### Additional Figures

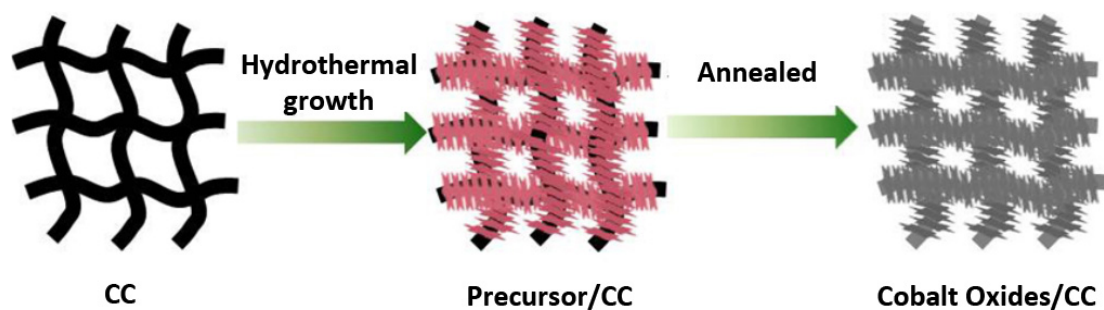

**Scheme S1** The process for the fabrication of cobalt oxides supported on the CC.

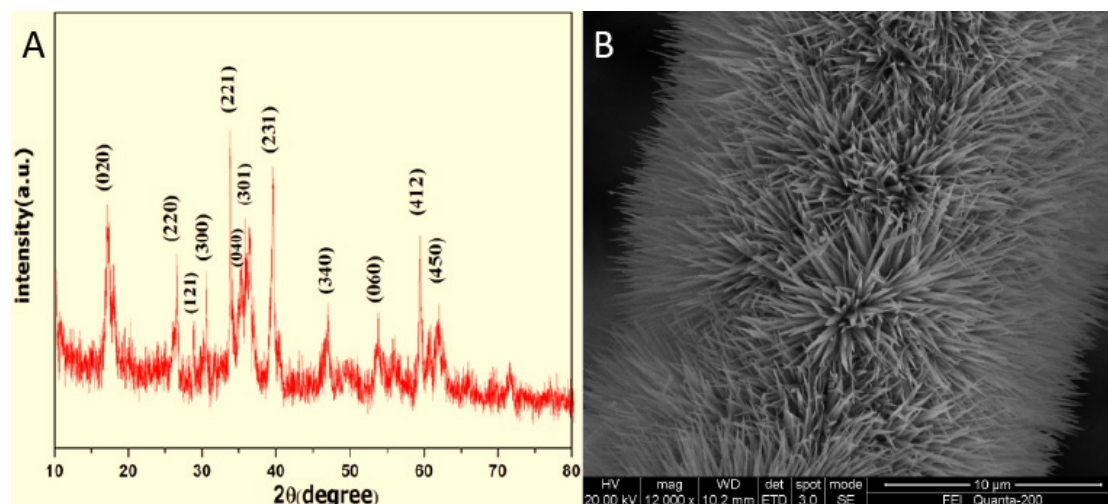

**Fig. S1** (A) XRD pattern of needle-like precursor scratched from the CC. (B) High-magnification SEM image of needle-like precursor supported on the CC.

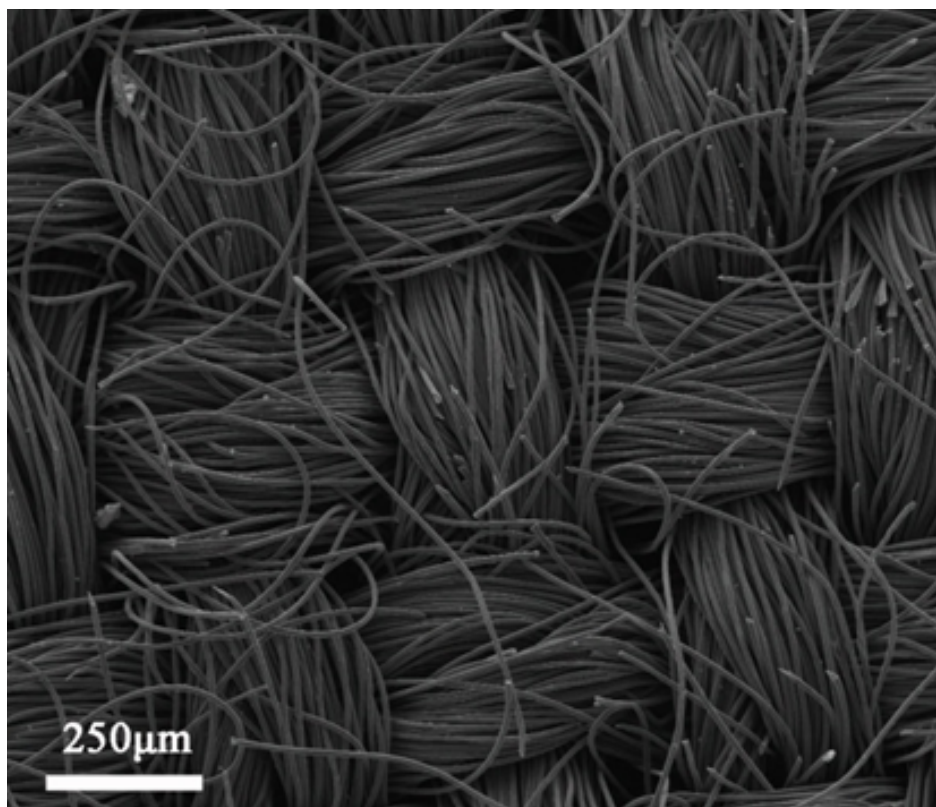

Fig. S2 SEM images of the carbon textiles.

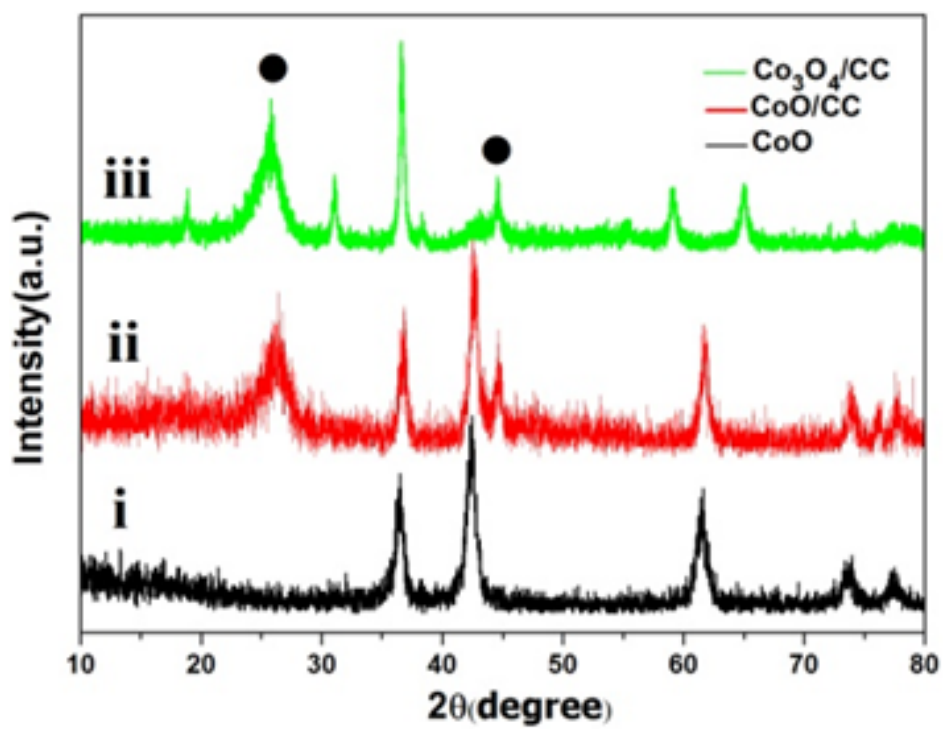

Fig. S3. XRD pattern of (i) Co<sub>3</sub>O<sub>4</sub> nanowires/CC, (ii) CoO nanosheets/CC, and (iii) nanowire-assembled CoO microspheres.
